# Supplementary material for: Effects of Antioxidant Intake on Fetal Development and Maternal/Neonatal Health during Pregnancy
Source: MDPI journal article supplement (doi:10.3390/antiox11040648), 2022-03-28
Supplement: s1 [file s1]

**Supplemental Table S1.** Grading of Recommendations Assessment, Development, and Evaluation (GRADE) of selected studies.

| Quality assessment                                                                                              |        |                                                           |                          |                                                        |                                                  | N° of patients |         | Effect                                                                                                                                                                              | Quality  | Importance     |                |
|-----------------------------------------------------------------------------------------------------------------|--------|-----------------------------------------------------------|--------------------------|--------------------------------------------------------|--------------------------------------------------|----------------|---------|-------------------------------------------------------------------------------------------------------------------------------------------------------------------------------------|----------|----------------|----------------|
| N° of studies                                                                                                   | Design | Risk of bias                                              | Inconsistency            | Indirectness                                           | Imprecision                                      | Cases          | Control | Relative (95%CI)                                                                                                                                                                    | Absolute |                |                |
| Fadinie (2019) [28]. Curcumin and PE (90 min of follow-up )                                                     |        |                                                           |                          |                                                        |                                                  |                |         |                                                                                                                                                                                     |          |                |                |
| 1                                                                                                               | RCCT   | Serious risk of bias (no information about randomization) | No Serious inconsistency | Serious indirectness ( no population data at baseline) | Serious imprecision (very wide range of results) | 23             | 24      | No significant effects on IL-10 or COX-2 serum levels                                                                                                                               | -        | Low ++/++++    | Less important |
| Shi (2018) [33]; Ding (2017) [35]. EGCG/Resveratrol and Nifedipine on PE (follow-up until normalization of BP ) |        |                                                           |                          |                                                        |                                                  |                |         |                                                                                                                                                                                     |          |                |                |
| 2                                                                                                               | RCCT   | No Serious risk of bias                                   | No Serious inconsistency | No serious indirectness                                | No serious imprecision                           | 322            | 331     | Time to control BP: Mean difference of 14.1 min (9.7-18.5; 95% CI) and 15.5 min (4.7-10.9; 95% CI) for EGCG and RESV, respectively<br><br>Time until new HC: Mean difference of 3.1 | -        | High ++++/++++ | Critical       |

|                                                                                        |                                   |                                                                                  |                          |                                                        |                                      |    |    |                                                                                                                              |   |                    |                |
|----------------------------------------------------------------------------------------|-----------------------------------|----------------------------------------------------------------------------------|--------------------------|--------------------------------------------------------|--------------------------------------|----|----|------------------------------------------------------------------------------------------------------------------------------|---|--------------------|----------------|
|                                                                                        |                                   |                                                                                  |                          |                                                        |                                      |    |    | h (2.3-3.9; 95% CI) and 2.5 h (0.3-2.4; 95% CI) for EGCG and RESV, respectively                                              |   |                    |                |
| <b>Hobson (2018) [34]. Melatonin an PE (follow-up from recruitment until delivery)</b> |                                   |                                                                                  |                          |                                                        |                                      |    |    |                                                                                                                              |   |                    |                |
| <b>1</b>                                                                               | Phase I single arm clinical trial | Serious risk of bias (unblinding, no randomization)                              | No Serious inconsistency | Serious indirectness (use of historical controls)      | No serious imprecision               | 20 | 48 | No significant effects on mean arterial BP Interval from diagnosis to delivery: mean 6 [ $\pm$ 2.3 SEM] days; P<0.05) vs HCC | - | Low<br>+/++++      | Important      |
| <b>Caldeira-Dias (2019) [36]. Resveratrol and PE (No follow-up)</b>                    |                                   |                                                                                  |                          |                                                        |                                      |    |    |                                                                                                                              |   |                    |                |
| <b>1</b>                                                                               | Observational                     | Serious risk of bias (unblinding, lack of information on the choice of patients) | No Serious inconsistency | Serious indirectness                                   | Serious imprecision (low population) | 6  | 6  | Improvement of HO-1 and NO markers and GSH levels in HUVECs treated with RESV                                                | - | Very Low<br>+/++++ | Less Important |
| <b>Caldeira-Dias (2021) [37]. Grape juice and PE (follow-up of 1 hour)</b>             |                                   |                                                                                  |                          |                                                        |                                      |    |    |                                                                                                                              |   |                    |                |
| <b>1</b>                                                                               | Phase I single arm open-label     | Serious risk of bias (unblinding, no randomization)                              | No serious inconsistency | Serious indirectness ( no population data at baseline) | Serious imprecision (low population) | 4  | -  | 17% $\pm$ 4, 50% $\pm$ 2 and 69% $\pm$ 7 decrease in HO-1, GSH and ARE activity levels, respectively,                        | - | Very Low<br>+/++++ | Important      |

|                                                                                                                            |                               |                                                     |                          |                                                   |                                      |    |    |                                                                                                                              |                                       |                   |           |
|----------------------------------------------------------------------------------------------------------------------------|-------------------------------|-----------------------------------------------------|--------------------------|---------------------------------------------------|--------------------------------------|----|----|------------------------------------------------------------------------------------------------------------------------------|---------------------------------------|-------------------|-----------|
|                                                                                                                            |                               |                                                     |                          |                                                   |                                      |    |    | after treatment<br>( $p < 0.05$ ) in HUVECs                                                                                  |                                       |                   |           |
| Miller (2014) [38]. Melatotin and fetal growth restriction (follow-up from recruitment until delivery)                     |                               |                                                     |                          |                                                   |                                      |    |    |                                                                                                                              |                                       |                   |           |
| 1                                                                                                                          | Phase I single arm open-label | Serious risk of bias (unblinding, no randomization) | No serious inconsistency | Serious indirectness (use of historical controls) | Serious imprecision (low population) | 6  | 6  | Significant lower MDA concentration ( $2.4 \pm 0.6$ nmol/mg tissue) versus control ( $4.6 \pm 0.7$ nmol/mg tissue; P = 0.04) | -                                     | Low ++/++++       | Important |
| Ghomian (2013) [86], Gupta (2020) [87]. Vitamin C use and reduction in PPROM                                               |                               |                                                     |                          |                                                   |                                      |    |    |                                                                                                                              |                                       |                   |           |
| 1                                                                                                                          | RCCT                          | Serious risk of bias (blinding)                     | No serious inconsistency | No serious indirectness                           | No serious imprecision               | 85 | 85 | RR 0.70                                                                                                                      | OR 0.31 (vit C)<br>OR 0.44 (controls) | Moderate +++/++++ | Critical  |
| 1                                                                                                                          | Case control study            | Undetected                                          | No serious inconsistency | No serious indirectness                           | No serious imprecision               | 20 | 20 | RR 0.18                                                                                                                      | OR 0.12 (vit C)<br>OR 0.66 (controls) | Low ++/++++       | Critical  |
| Sharma (2014) [88], Ilhan (2107) [95], Ilhan (2015) [15], Hassanzadeh (2016) [93]. Plasmatic ascorbic acid levels in PPROM |                               |                                                     |                          |                                                   |                                      |    |    |                                                                                                                              |                                       |                   |           |



[illegible]

|                                                                                                                      |                    |                                 |                          |                         |                                         |       |       |   |                                                       |                       |                            |
|----------------------------------------------------------------------------------------------------------------------|--------------------|---------------------------------|--------------------------|-------------------------|-----------------------------------------|-------|-------|---|-------------------------------------------------------|-----------------------|----------------------------|
| 1                                                                                                                    | Case control study | Undetected                      | No serious inconsistency | No serious indirectness | No serious imprecision                  | 130   | 381   | - | 29.6±9.51 mg (PTB)<br>33.57±11.30 mg (controls)       | Low<br>++/++++        | Important but not critical |
| <b>Koenig (2017) [96]. Vitamin E intake and premature cervical remodeling</b>                                        |                    |                                 |                          |                         |                                         |       |       |   |                                                       |                       |                            |
| 1                                                                                                                    | Cohort study       | Undetected                      | No serious inconsistency | No serious indirectness | Serious imprecision (small sample size) | 47    |       | - | 22.0±22.56 IU (high risk)<br>45.5±42.86 IU (low risk) | Very low<br>+/++++    | Important but not critical |
| <b>Gungorduk (2014) [92]. Effect of vitamin C+E supplementation to increase latency period before birth in PPROM</b> |                    |                                 |                          |                         |                                         |       |       |   |                                                       |                       |                            |
| 1                                                                                                                    | RCCT               | Serious risk of bias (blinding) | No serious inconsistency | No serious indirectness | No serious imprecision                  | 126   | 123   | - | 11.2±6.3 days (vit C+E)<br>6.2±4.0 days (controls)    | Moderate<br>+++ /++++ | Important but not critical |
| <b>Hauth (2010) [94]. Vitamin C+E and reduction in PPROM+PTB before 32 gestational weeks</b>                         |                    |                                 |                          |                         |                                         |       |       |   |                                                       |                       |                            |
| 1                                                                                                                    | RCCT               | Undetected                      | No serious inconsistency | No serious indirectness | No serious imprecision                  | 4,992 | 4,976 | - | OR 0.5 (0.27-0.93)                                    | High<br>++++/++++     | Important but not critical |
| <b>Hauth (2010) [94]. Vitamin C+E effect on PTB</b>                                                                  |                    |                                 |                          |                         |                                         |       |       |   |                                                       |                       |                            |
| 1                                                                                                                    | RCCT               | Undetected                      | No serious inconsistency | No serious indirectness | No serious imprecision                  | 4,992 | 4,976 | - | OR 1.05 (0.90-1.22)                                   | High<br>++++/++++     | Of limited importance      |

| Zahiri (2015) [101]. Zinc and risk of PPROM                                               |                    |                                 |                          |                                               |                        |       |     |                                               |                                                            |                       |                            |
|-------------------------------------------------------------------------------------------|--------------------|---------------------------------|--------------------------|-----------------------------------------------|------------------------|-------|-----|-----------------------------------------------|------------------------------------------------------------|-----------------------|----------------------------|
| 1                                                                                         | RCCT               | Undetected                      | No serious inconsistency | Serious indirectness (different intervention) | No serious imprecision | 270   | 270 | RR 0.08 (Zn)<br>RR 0.07 (controls)            | OR 0.09 (Zn)<br>OR 0.07 (controls)                         | High<br>++++/++++     | Important but not critical |
| Kucukaydin (2018) [103], Shen (2015) [104]. Plasmatic Zinc levels in PPROM                |                    |                                 |                          |                                               |                        |       |     |                                               |                                                            |                       |                            |
| 1                                                                                         | Case control study | Undetected                      | No serious inconsistency | No serious indirectness                       | No serious imprecision | 35    | 38  | -                                             | 0.80±0.30 mg/L (PPROM)<br>1.76±0.74 mg/L (controls)        | Low<br>++/++++        | Important but not critical |
| 1                                                                                         | Cohort study       | Undetected                      | No serious inconsistency | No serious indirectness                       | No serious imprecision | 1,568 |     | -                                             | 73.21±13.9 µmol/L (PPROM)<br>84.55±14.38 µmol/L (controls) | Low<br>++/++++        | Important but not critical |
| Nga (2020) [99], Nossier (2015) [100], Zahiri (2015) [101]. Zinc use and reduction of PTB |                    |                                 |                          |                                               |                        |       |     |                                               |                                                            |                       |                            |
| 3                                                                                         | RCCT               | Serious risk of bias (blinding) | No serious inconsistency | No serious indirectness                       | No serious imprecision | 798   | 650 | RR 0.012-0.13 (Zn)<br>RR 0.05-0.10 (controls) | OR 0.01-0.16 (Zn)<br>OR 0.06-0.12 (controls)               | Moderate<br>+++ /++++ | Important but not critical |
| Shen (2015) [104]. Plasmatic zinc levels in PTB                                           |                    |                                 |                          |                                               |                        |       |     |                                               |                                                            |                       |                            |
| 1                                                                                         | Cohort study       | Undetected                      | No serious inconsistency | No serious indirectness                       | No serious imprecision | 1,568 |     | -                                             | 73.55±14.09 µmol/L (PTB)<br>84.55±14.38 µmol/L (controls)  | Low<br>++/++++        | Important but not critical |

| Chen (2018) [105], Huang (2016) [106], Lu (2017) [107], Okubo (2015) [108], Moussally (2010) [109], Sengpiel (2013) [110], Sindiani (2020) [111]. Tea intake association with PTB |                    |                                               |                          |                                              |                        |        |     |                                                  |                                                           |                 |                            |
|-----------------------------------------------------------------------------------------------------------------------------------------------------------------------------------|--------------------|-----------------------------------------------|--------------------------|----------------------------------------------|------------------------|--------|-----|--------------------------------------------------|-----------------------------------------------------------|-----------------|----------------------------|
| 1                                                                                                                                                                                 | Case control study | Serious risk of bias (unmatched case control) | No serious inconsistency | No serious indirectness                      | No serious imprecision | 314    | 796 | -                                                | OR 1.43 (>3cups/day)                                      | Very low +/++++ | Important but not critical |
| 6                                                                                                                                                                                 | Cohort study       | Undetected                                    | No serious inconsistency | No serious indirectness                      | No serious imprecision | 88,381 |     | -                                                | OR 0.88-1.61                                              | Low ++/++++     | Important but not critical |
| Biran (2019) [112], Ramiro-Cortijo (2020) [115], Specht (2019) [116]. Mother plasma melatonin reduced levels at birth.                                                            |                    |                                               |                          |                                              |                        |        |     |                                                  |                                                           |                 |                            |
| 1                                                                                                                                                                                 | Cohort study       | Undetected                                    | No serious inconsistency | No serious indirectness                      | No serious imprecision | 169    |     | RR 0.78 (<34GWs)<br>RR 0.57 (>34GWs)             | OR 3.5 (<34GWs)<br>OR 1.34 (>34 GWs)                      | Low ++/++++     | Critical                   |
| 1                                                                                                                                                                                 | Cohort study       | Undetected                                    | No serious inconsistency | Serious indirectness (because of population) | No serious imprecision | 104    |     | -                                                | Lower mother melatonin plasmatic levels in PTB (p<0.024). | Very low +/++++ | Critical                   |
| Specht (2019) [116]. Night work during pregnancy and association with PTB.                                                                                                        |                    |                                               |                          |                                              |                        |        |     |                                                  |                                                           |                 |                            |
| 1                                                                                                                                                                                 | Cohort study       | Undetected                                    | No serious inconsistency | No serious indirectness                      | No serious imprecision | 16,501 |     | RR 0.05 (night-working)<br>RR 0.05 (day-working) | OR 0.05 (night-working)<br>OR 0.05 (day-working)          | Low ++/++++     | Of limited importance      |



| <b>Zarban (2015) [121], Melo (2017) [125], Medeiros (2016) [126], Clemente (2015) [135]. Vitamin C/E and breastfeeding (follow-up of maximum 30 days )</b> |                 |                                         |                          |                                              |                        |     |     |                                                                                                               |   |                       |           |
|------------------------------------------------------------------------------------------------------------------------------------------------------------|-----------------|-----------------------------------------|--------------------------|----------------------------------------------|------------------------|-----|-----|---------------------------------------------------------------------------------------------------------------|---|-----------------------|-----------|
| <b>4</b>                                                                                                                                                   | RCCT            | No serious risk of bias                 | No serious inconsistency | No serious indirectness                      | No serious imprecision | -   | -   | Supplements of vitamin C and E increase anti-oxidant content of breastmilk, especially in colostrum (p< 0.05) | - | High<br>++++/++++     | Important |
| <b>Hoppu (2005) [120].Vitamin C and breastfeeding (follow-up of 12 months)</b>                                                                             |                 |                                         |                          |                                              |                        |     |     |                                                                                                               |   |                       |           |
| <b>1</b>                                                                                                                                                   | Cross-sectional | Serious risk of bias (no control group) | No serious inconsistency | No serious indirectness                      | No serious imprecision | 65  | -   | Decrease the risk of atopy in high-risk infants (p< 0.05)                                                     | - | Low<br>++/++++        | Important |
| <b>Friel (2007) [123].Vitamin C/iron and breastfeeding (No follow-up)</b>                                                                                  |                 |                                         |                          |                                              |                        |     |     |                                                                                                               |   |                       |           |
| <b>1</b>                                                                                                                                                   | Experimental    | Serious risk of bias                    | No serious inconsistency | No serious indirectness                      | No serious imprecision | 65  | -   | Iron may provoke oxidative stress in preterm infants and should be divided from vitamin C (p< 0.05)           | - | Very low<br>+/++++    | Important |
| <b>Daneel-Otterbech (2005) [122].Vitamin C and breastfeeding (No follow-up)</b>                                                                            |                 |                                         |                          |                                              |                        |     |     |                                                                                                               |   |                       |           |
| <b>1</b>                                                                                                                                                   | RCCT            | Serious risk of bias                    | No serious inconsistency | Serious indirectness (different populations) | No serious imprecision | 171 | 142 | Significant increase of AA in human milk after AA supplementation                                             | - | Moderate<br>+++ /++++ | Important |

|                                                                                                         |              |                         |                          |                         |                        |    |     |                                                                                                              |   |                   |           |
|---------------------------------------------------------------------------------------------------------|--------------|-------------------------|--------------------------|-------------------------|------------------------|----|-----|--------------------------------------------------------------------------------------------------------------|---|-------------------|-----------|
|                                                                                                         |              |                         |                          |                         |                        |    |     | (1000 mg/d for 10 d)<br>African women:<br>41 mg/kg (p< 0.001)<br>European women:<br>10 mg/kg (p=0.03)        |   |                   |           |
| <b>Loui (2004) [131], Shaaban (2005) [130] Selenium and zinc and breastfeeding (variable follow-up)</b> |              |                         |                          |                         |                        |    |     |                                                                                                              |   |                   |           |
| <b>2</b>                                                                                                | RCCT         | No serious risk of bias | No serious inconsistency | No serious indirectness | No serious imprecision | -  | -   | Zn supplements in lactating women increased breast milk Zn levels (p< 0.05)European women: 10 mg/kg (p=0.03) | - | High ++++/++++    | Important |
| <b>Strambi (2004) [129]. Selenium and zinc and breastfeeding (follow-up of 4 weeks)</b>                 |              |                         |                          |                         |                        |    |     |                                                                                                              |   |                   |           |
| <b>1</b>                                                                                                | Longitudinal | No serious risk of bias | No serious inconsistency | No serious indirectness | No serious imprecision | 81 | 129 | Breast-fed SGA higher plasma Se concentrations than formula-fed newborns (p< 0.05)                           | - | Moderate +++/++++ | Important |
| <b>Qin (2019) [133]. Melatonin (follow-up of 30 days)</b>                                               |              |                         |                          |                         |                        |    |     |                                                                                                              |   |                   |           |

|                                                                      |              |                                                              |                          |                                                          |                                                     |    |    |                                                                             |   |                      |                |
|----------------------------------------------------------------------|--------------|--------------------------------------------------------------|--------------------------|----------------------------------------------------------|-----------------------------------------------------|----|----|-----------------------------------------------------------------------------|---|----------------------|----------------|
| 1                                                                    | Longitudinal | No serious risk of bias                                      | No serious inconsistency | No serious indirectness                                  | No serious imprecision                              | 32 | 66 | Circadian rhythm in breast milk, highest peak level in colostrum, (p< 0.05) | - | Moderate<br>+++/++++ | Important      |
| <b>Honorio-Franca (2013) [134]. Melatonin (follow-up of 30 days)</b> |              |                                                              |                          |                                                          |                                                     |    |    |                                                                             |   |                      |                |
| 1                                                                    | RCCT         | Serious risk of bias<br>(no information about randomization) | No Serious inconsistency | Serious indirectness<br>(no population data at baseline) | Serious imprecision<br>(very wide range of results) | 23 | 24 | No significant effects on IL-10 or COX-2 serum levels                       | - | Low<br>++/++++       | Less important |

**Abbreviations:** ARE: antioxidant response element; BP: blood pressure; COX-2: cyclooxygenase-2; EGCG: epigallocatechin gallate; GRADE: Grading of Recommendations Assessment, Development, and Evaluation; GSH: glutathione; GWs: gestational weeks; HC: hypertensive crisis; HO-1: heme oxygenase-1; HUVECs: human umbilical vein endothelial cells; IL-10: interleukin 10; MDA:; NO: nitric oxide; PPRM: preterm premature rupture of membranes; PTB: preterm birth; RCCT: randomized controlled clinical trial; SGA: small for gestational age; Vit: vitamin; Zn: zinc. Quality of evidence grades: high (++++), moderate (+++), low (++), very low (+).
